# Supplementary material
Source: ML conference proceedings conference paper supplement (https://openreview.net/forum?id=3Jf4Fr2I4T2)
Supplement: supplementary_material [file attachment]

## A INEQUALITIES FOR GAUSSIAN PROCESSES

In this section, we review some inequalities on the maximum of a Gaussian process. Let  $G(x)$  be a separable zero-mean Gaussian process with  $x \in \Gamma$ . Define the metric on  $\Gamma$  by

$$\mathfrak{d}_g(G(x_1), G(x_2)) = \sqrt{\mathbb{E}(G(x_1) - G(x_2))^2}.$$

The  $\epsilon$ -covering number of the metric space  $(\Gamma, \mathfrak{d}_g)$ , denoted as  $N(\epsilon, \Gamma, \mathfrak{d}_g)$ , is the minimum integer  $N$  so that there exist  $N$  distinct balls in  $(\Gamma, \mathfrak{d}_g)$  with radius  $\epsilon$ , and the union of these balls covers  $\Gamma$ . Let  $D$  be the diameter of  $\Gamma$  with respect to the metric  $\mathfrak{d}_g$ . The supremum of a Gaussian process is closely tied to a quantity called the *entropy integral*, defined as

$$\int_0^{D/2} \sqrt{\log N(\epsilon, \Gamma, \mathfrak{d}_g)} d\epsilon. \quad (14)$$

For detailed discussion of entropy integral, we refer to Adler & Taylor (2009).

Lemma 1 provides an upper bound on the expectation of the maximum value of a Gaussian process, which is Theorem 1.3.3 of Adler & Taylor (2009).

**Lemma 1** *Let  $G(x)$  be a separable zero-mean Gaussian process with  $x$  lying in a  $\mathfrak{d}_g$ -compact set  $\Gamma$ , where  $\mathfrak{d}_g$  is the metric. Let  $N$  be the  $\epsilon$ -covering number. Then there exists a universal constant  $\eta$  such that*

$$\mathbb{E} \left( \sup_{x \in \Gamma} G(x) \right) \leq \eta \int_0^{D/2} \sqrt{\log N(\epsilon, \Gamma, \mathfrak{d}_g)} d\epsilon. \quad (15)$$

Lemma 2, which is Theorem 2.1.1 of Adler & Taylor (2009), presents a concentration inequality.

**Lemma 2** *Let  $G$  be a separable Gaussian process on a  $\mathfrak{d}_g$ -compact  $\Gamma$  with mean zero, then for all  $u > 0$ ,*

$$\mathbb{P} \left( \sup_{x \in \Gamma} G(x) - \mathbb{E}(\sup_{x \in \Gamma} G(x)) > u \right) \leq e^{-u^2/2\sigma_\Gamma^2}, \quad (16)$$

where  $\sigma_\Gamma^2 = \sup_{x \in \Gamma} \mathbb{E}G(x)^2$ .

Theorem 3 is a slightly strengthened version of Theorem 1 of Wang et al. (2020). Its proof, in Section E, is based on Lemmas 1-2 and some machinery from scattered data approximation Wendland (2004).

**Theorem 3** *Suppose Condition 1 holds. Let  $\mu(x)$  and  $\sigma(x)$  be as in Equation 2 and Equation 3, respectively, and  $D_\Omega = \text{diam}(\Omega)$  be the Euclidean diameter of  $\Omega$ . Then for any  $u > 0$ , and any closed deterministic subset  $A \subset \Omega$ , with probability at least  $1 - \exp\{-u^2/(2\sigma_A^2)\}$ , the kriging prediction error has the upper bound*

$$\sup_{x \in A} Z(x) - \mu(x) \leq \eta_1 \sigma_A \sqrt{p(1 \vee \log(A_0 D_\Omega))} \sqrt{\log(e\sigma/\sigma_A)} + u, \quad (17)$$

where  $A_0$  is defined in Condition 1,  $\eta_1$  is a universal constant, and  $\sigma_A = \sup_{x \in A} \sigma(x)$ .

## B PROOF OF THEOREM 1

We proof Theorem 1 by partitioning  $\Omega$  into subregions, and applying Theorem 3 on each of them. Let  $\Omega_i = \{x \in \Omega | \sigma e^{-i} \leq \sigma(x) \leq \sigma e^{-i+1}\}$ , for  $i = 1, \dots$ . Let  $\sigma_i = \sup_{x \in \Omega_i} \sigma(x)$ .

Take  $\eta_2 = \eta_1 \sqrt{2e}$ . By Theorem 3, we have

$$\begin{aligned}
& P \left( \sup_{x \in \Omega} \frac{Z(x) - \mu(x)}{\sigma(x) \log^{1/2}(e\sigma/\sigma(x))} > \eta_2 \sqrt{p(1 \vee \log(A_0 D_\Omega))} + u \right) \\
& \leq \sum_{i=1}^{\infty} P \left( \sup_{x \in \Omega_i} \frac{Z(x) - \mu(x)}{\sigma(x) \log^{1/2}(e\sigma/\sigma(x))} > \eta_2 \sqrt{p(1 \vee \log(A_0 D_\Omega))} + u \right) \\
& \leq \sum_{i=1}^{\infty} P \left( \sup_{x \in \Omega_i} Z(x) - \mu(x) > (\eta_2 \sqrt{p(1 \vee \log(A_0 D_\Omega))} + u) \sigma_i e^{-i} \sqrt{i} \right) \\
& \leq \sum_{i=1}^{\infty} P \left( \sup_{x \in \Omega_i} Z(x) - \mu(x) > (\eta_2 \sqrt{p(1 \vee \log(A_0 D_\Omega))} + u) \sigma_i \log^{1/2}(e\sigma/\sigma_i) / (\sqrt{2e}) \right) \\
& \leq \sum_{i=1}^{\infty} \exp \{ -u^2 \log(e\sigma/\sigma_i) / (4e^2) \} \\
& \leq \sum_{i=1}^{\infty} \exp \{ -iu^2 / (4e^2) \} = \frac{\exp \{ -u^2 / (4e^2) \}}{1 - \exp \{ -u^2 / (4e^2) \}},
\end{aligned}$$

which, together with the fact that  $M \geq 0$ , implies the following upper bound of  $\mathbb{E}M$

$$\begin{aligned}
\mathbb{E}M &= \int_0^\infty \mathbb{P}(M > x) dx \\
&\leq \left( \int_0^{\eta_2 \sqrt{p(1 \vee \log(A_0 D_\Omega))} + 1} + \int_{\eta_2 \sqrt{p(1 \vee \log(A_0 D_\Omega))} + 1}^\infty \right) \mathbb{P}(M > x) dx \\
&\leq \eta_2 \sqrt{p(1 \vee \log(A_0 D_\Omega))} + 1 + \int_1^\infty \frac{2 \exp \{ -x^2 / (4e^2) \}}{1 - \exp \{ -x^2 / (4e^2) \}} dx \\
&\leq C_0 \sqrt{p(1 \vee \log(A_0 D_\Omega))}.
\end{aligned}$$

To access the tail probability, we note that  $M - \mathbb{E}M$  is also a Gaussian process with mean zero. Thus by Lemma 2, we have

$$\mathbb{P}(M - \mathbb{E}M > t) \leq e^{-t^2/2\sigma_M^2},$$

where

$$\sigma_M^2 = \sup_{x \in \Omega} \mathbb{E} \frac{(Z(x) - \mu(x))^2}{\sigma(x)^2 \log(e\sigma/\sigma(x))} \leq 1.$$

Hence, we complete the proof.

## C INDEPENDENCE IN SEQUENTIAL GAUSSIAN PROCESS MODELING

The proof of Theorem 2 relies on certain independence properties of sequential Gaussian process modeling shown in Lemmas 3-4. First we introduce some notation. For an arbitrary function  $f$ , and  $X = (x_1, \dots, x_n)$ , define  $f(X) = (f(x_1), \dots, f(x_n))^T$ , and

$$\mathcal{I}_{\Psi, X} f(x) = r^T(x) K^{-1} f(X), \quad (18)$$

where  $r = (\Psi(x - x_1), \dots, \Psi(x - x_n))^T$ ,  $K = (\Psi(x_j - x_k))_{j,k}$ . For notational convenience, we define  $\mathcal{I}_{\Psi, \emptyset} f = 0$ .

**Lemma 3** *Let  $Z$  be a stationary Gaussian process with mean zero and correlation function  $\Psi$ . For two sets of scattered points  $X' \subset X = (x_1, \dots, x_n)$ , we have*

$$Z - \mathcal{I}_{\Psi, X'} Z = (Z - \mathcal{I}_{\Psi, X} Z) + \mathcal{I}_{\Psi, X}(Z - \mathcal{I}_{\Psi, X'} Z). \quad (19)$$

*In addition, if  $X$  and  $X'$  are deterministic sets, then the residual  $Z - \mathcal{I}_{\Psi, X} Z$  and the vector of observed data  $(Z(x_1), \dots, Z(x_n))^T$  are mutually independent Gaussian process and vector, respectively.*

**Proof** It is easily seen that  $\mathcal{I}_{\Psi, X}$  and  $\mathcal{I}_{\Psi, X'}$  are linear operators and  $\mathcal{I}_{\Psi, X'} \mathcal{I}_{\Psi, X} = \mathcal{I}_{\Psi, X}$ , which implies Equation 19.

The residual  $Z - \mathcal{I}_{\Psi, X} Z$  is a Gaussian process because  $\mathcal{I}_{\Psi, X}$  is linear. The independence between the Gaussian process and the vector can be proven by calculation the covariance

$$\begin{aligned} & \text{Cov}(Z(x') - \mathcal{I}_{\Psi, X'} Z(x'), Z(X)) \\ &= \text{Cov}(Z(x') - r^T(x') K^{-1} Z(X), Z(X)) \\ &= r(x') - r(x') = 0, \end{aligned}$$

which completes the proof.  $\blacksquare$

**Lemma 4** *For any instance algorithm of Bayesian optimization, the following statements are true.*

1. *Conditional on  $\mathcal{F}_{n-1}$  and  $X_n$ , the residual process  $Z(\cdot) - \mu_n(\cdot)$  is independent of  $\mathcal{F}_n$ .*
2. *Conditional on  $\mathcal{F}_n$ , the residual process  $Z(\cdot) - \mu_n(\cdot)$  is a Gaussian process with same law as  $Z'(\cdot) - \mathcal{I}_{\Psi, X_{1:n}} Z'(\cdot)$ , where  $Z'$  is an independent copy of  $Z$ .*

**Proof** We use induction on  $n$ . For  $n = 1$ , the desired results are direct consequences of Lemma 3, because the design set is suppressed conditional on  $\mathcal{F}_0$ .

Now suppose that we have proven already the assertion for  $n$  and want to conclude it for  $n + 1$ . First, we invoke the decomposition given by Lemma 3 to have

$$Z' - \mathcal{I}_{\Psi, X_{1:n}} Z' = (Z' - \mathcal{I}_{\Psi, X_{1:(n+1)}} Z') + \mathcal{I}_{\Psi, X_{1:(n+1)}} (Z' - \mathcal{I}_{\Psi, X_{1:n}} Z'). \quad (20)$$

Because  $\mu_n = \mathcal{I}_{\Psi, X_{1:n}} Z$ , we also have

$$Z - \mu_n = (Z - \mu_{n+1}) + \mathcal{I}_{\Psi, X_{1:(n+1)}} (Z - \mu_n). \quad (21)$$

By the inductive hypothesis,  $Z - \mu_n$  has the same law as  $Z' - \mathcal{I}_{\Psi, X_{1:n}} Z'$  conditional on  $\mathcal{F}_n$ , denoted by  $Z - \mu_n \stackrel{d}{=} Z' - \mathcal{I}_{\Psi, X_{1:n}} Z' | \mathcal{F}_n$ . Our assumption that  $X_{n+1}$  is independent of  $(Z, Z')$  conditional on  $\mathcal{F}_n$  implies that  $X_{n+1}$  is independent of  $(Z - \mu_n, Z' - \mathcal{I}_{\Psi, X_{1:n}} Z')$  as well. Thus,

$$Z - \mu_n \stackrel{d}{=} Z' - \mathcal{I}_{\Psi, X_{1:n}} Z' | \mathcal{F}_n, X_{n+1}.$$

Clearly, this equality in distribution is preserved by acting  $\mathcal{I}_{\Psi, X_{1:(n+1)}}$  on both sides, which implies

$$(Z - \mu_n, \mathcal{I}_{\Psi, X_{1:(n+1)}} (Z - \mu_n)) \stackrel{d}{=} (Z' - \mathcal{I}_{\Psi, X_{1:n}} Z', \mathcal{I}_{\Psi, X_{1:(n+1)}} (Z' - \mathcal{I}_{\Psi, X_{1:n}} Z')) | \mathcal{F}_n, X_{n+1}.$$

Incorporating the above equation with Equation 20 and Equation 21 yields

$$(Z - \mu_{n+1}, Z - \mu_n) \stackrel{d}{=} (Z' - \mathcal{I}_{\Psi, X_{1:(n+1)}} Z', Z' - \mathcal{I}_{\Psi, X_{1:n}} Z') | \mathcal{F}_n, X_{n+1}. \quad (22)$$

Now we consider the vectors  $V := Z(X_{n+1}) - \mu_n(X_{n+1})$  and  $V' = Z'(X_{n+1}) - \mathcal{I}_{\Psi, X_{1:n}} Z'(X_{n+1})$ . Then Equation 22 implies

$$(Z - \mu_{n+1}, V) \stackrel{d}{=} (Z' - \mathcal{I}_{\Psi, X_{1:(n+1)}} Z', V') | \mathcal{F}_n, X_{n+1}. \quad (23)$$

Because  $V'$  consists of observed data, we can apply Lemma 3 to obtain that, conditional on  $\mathcal{F}_n$  and  $X_{n+1}$ ,  $Z' - \mathcal{I}_{\Psi, X_{1:(n+1)}} Z'$  is independent of  $V'$ , which, together with Equation 23, implies that  $Z - \mu_{n+1}$  and  $V$  are independent conditional on  $\mathcal{F}_n$  and  $X_{n+1}$ . Because  $\mu_n(X_{n+1})$  is measurable with respect to the  $\sigma$ -algebra generated by  $\mathcal{F}_n$  and  $X_{n+1}$ , we obtain that  $Z - \mu_{n+1}$  is independent of  $Z(X_{n+1})$  conditional on  $\mathcal{F}_n$  and  $X_{n+1}$ , which proves Statement 1. Combining Statement 1 and Equation 22 yields Statement 2.  $\blacksquare$

## D PROOF OF THEOREM 2

The law of total probability implies

$$\begin{aligned}
& \mathbb{P}(M_T - C\sqrt{p(1 \vee \log(A_0 D_\Omega))} > t) \\
&= \sum_{i=n}^{\infty} \mathbb{P}(M_T - C\sqrt{p(1 \vee \log(A_0 D_\Omega))} > t | T = n) \mathbb{P}(T = n) \\
&= \sum_{n=1}^{\infty} \mathbb{P}(M_n - C\sqrt{p(1 \vee \log(A_0 D_\Omega))} > t | T = n) \mathbb{P}(T = n) \\
&= \sum_{n=1}^{\infty} \mathbb{E} \left\{ \mathbb{P}(M_n - C\sqrt{p(1 \vee \log(A_0 D_\Omega))} > t | \mathcal{F}_n) \middle| T = n \right\} \mathbb{P}(T = n),
\end{aligned}$$

where the last equality follows from the fact that  $\{T = n\} \in \mathcal{F}_n$ , namely,  $T$  is a stopping time. Clearly, the desired results are proven if we can show  $\mathbb{P}(M_n - C\sqrt{p(1 \vee \log(A_0 D_\Omega))} > t | \mathcal{F}_n) < e^{-t^2/2}$ . Now we resort to part 2 of Lemma 4, which states that conditional on  $\mathcal{F}_n$ ,  $Z(\cdot) - \mu_n(\cdot)$  is identical in law to its independent copy  $Z'(\cdot) - \mathcal{I}_{\Psi, X_{1:n}} Z'(\cdot)$ . Although the event  $\{M_n - C\sqrt{p(1 \vee \log(A_0 D_\Omega))} > t\}$  looks complicated, it is measurable with respect to  $Z(\cdot) - \mu_n(\cdot)$ . Thus, we arrive at

$$\begin{aligned}
& \mathbb{P}(M_n - C\sqrt{p(1 \vee \log(A_0 D_\Omega))} > t | \mathcal{F}_n) \\
&= \mathbb{P} \left( \sup_{x \in \Omega} \frac{Z'(x) - \mathcal{I}_{\Phi, X_{1:n}} Z'(x)}{\sigma_n(x) \log^{1/2}(e\sigma/\sigma_n(x))} - C\sqrt{p(1 \vee \log(A_0 D_\Omega))} > t | \mathcal{F}_n \right). \quad (24)
\end{aligned}$$

Because  $Z'$  is independent of  $Z$ , the part of conditioning with respect to  $Z(X_{1:n})$  in Equation 24 has no effect on  $Z'$ . The only thing that matters is the effect of the conditioning on the design points  $X_{1:n}$ . Hence, Equation 24 is reduced to

$$\mathbb{P} \left( \sup_{x \in \Omega} \frac{Z'(x) - \mathcal{I}_{\Phi, X_{1:n}} Z'(x)}{\sigma_n(x) \log^{1/2}(e\sigma/\sigma_n(x))} - C\sqrt{p(1 \vee \log(A_0 D_\Omega))} > t | X_{1:n} \right). \quad (25)$$

Clearly, we can regard the points  $X_{1:n}$  in the formula above as a fixed design. Then the probability Equation 25 is bounded above by  $e^{-t^2/2}$  as asserted by Corollary 1.

## E PROOF OF THEOREM 3

This proof is similar to Theorem 1 of Wang et al. (2020) but with a few technical improvements.

Because  $\mu(x)$  is a linear combination of  $Z(x_i)$ 's,  $\mu(x)$  is also a Gaussian process. The main idea of the proof is to invoke a maximum inequality for Gaussian processes, which states that the supremum of a Gaussian process is no more than a multiple of the integral of the covering number with respect to its natural distance  $\mathfrak{d}$ . See Adler & Taylor (2009); van der Vaart & Wellner (1996) for related discussions.

Let  $g(x) = Z(x) - \mu(x)$ . For any  $x, x' \in A$ , because  $A$  is deterministic, we have

$$\begin{aligned}
\mathfrak{d}(x, x')^2 &= \mathbb{E}(g(x) - g(x'))^2 \\
&= \mathbb{E}(Z(x) - \mu(x) - (Z(x') - \mu(x'))^2) \\
&= \sigma^2(\Psi(x - x) - r^T(x)K^{-1}r(x) + \Psi(x' - x') - r^T(x')K^{-1}r(x') \\
&\quad - 2[\Psi(x - x') - r^T(x')K^{-1}r(x)]),
\end{aligned}$$

where  $r(\cdot) = (\Psi(\cdot - x_1), \dots, \Psi(\cdot - x_n))^T$ ,  $K = (\Psi(x_j - x_k))_{jk}$ .

The rest of our proof consists of the following steps. In step 1, we bound the covering number  $N(\epsilon, A, \mathfrak{d})$ . Next we bound the diameter  $D$ . In step 3, we obtain a bound for the entropy integral. In the last step, we invoke Lemmas 1 and 2 to obtain the desired results.

**Step 1: Bounding the covering number**

Let  $h(\cdot) = \Psi(x - \cdot) - \Psi(x' - \cdot)$ . It can be verified that

$$\mathfrak{d}(x, x')^2 = -\sigma^2[h(x') - \mathcal{I}_{\Psi, X}h(x')] + \sigma^2[h(x) - \mathcal{I}_{\Psi, X}h(x)].$$

By Theorem 11.4 of Wendland (2004),

$$\mathfrak{d}(x, x')^2 \leq 2\sigma^2(\sigma_A/\sigma\|h\|_{\mathcal{N}_\Psi(\mathbf{R}^d)}) = 2\sigma\sigma_A\|h\|_{\mathcal{N}_\Psi(\mathbf{R}^d)}, \quad (26)$$

where

$$\sigma_A^2 = \sup_{x \in A} \sigma(x)^2 = \sigma^2 \sup_{x \in A} (\Psi(x - x) - r^T(x)K^{-1}r(x)).$$

Denote the Euclidean norm by  $\|\cdot\|$ . Then, by the definition of the spectral density and the mean value theorem, we have

$$\begin{aligned} \|h\|_{\mathcal{N}_\Psi(\mathbf{R}^d)}^2 &= \Psi(x - x) - 2\Psi(x' - x) + \Psi(x' - x') \\ &= 2 \int_{\mathbf{R}^d} (1 - \cos((x - x')^T \omega)) \tilde{\Psi}(\omega) d\omega \\ &\leq \left( 2 \int_{\mathbf{R}^d} \|\omega\| \tilde{\Psi}(\omega) d\omega \right) \|x - x'\| \\ &\leq 2A_0 \|x - x'\|, \end{aligned} \quad (27)$$

where the last inequality follows from the fact that  $\|\omega\| \leq \|\omega\|_1$ . Combining Equation 26 and Equation 27 yields

$$\mathfrak{d}(x, x')^2 \leq 2A_0^{1/2} \sigma\sigma_A \|x - x'\|^{1/2}. \quad (28)$$

Therefore, the covering number is bounded above by

$$\log N(\epsilon, A, \mathfrak{d}) \leq \log N\left(\frac{\epsilon^4}{4A_0\sigma^2\sigma_A^2}, A, \|\cdot\|\right). \quad (29)$$

The right side of Equation 29 involves the covering number of a Euclidean ball, which is well understood in the literature. See Lemma 4.1 of Pollard (1990). This result leads to the bound

$$\log N(\epsilon, A, \mathfrak{d}) \leq p \log \left( \frac{48A_0 D_A \sigma^2 \sigma_A^2}{\epsilon^4} + 1 \right) \leq p \log \left( \frac{48A_0 D_\Omega \sigma^2 \sigma_A^2}{\epsilon^4} + 1 \right), \quad (30)$$

where  $D_A = \text{diam}(A)$  and  $D_\Omega = \text{diam}(\Omega)$  are the Euclidean diameter of  $A$  and  $\Omega$ , respectively.

**Step 2: Bounding the diameter  $D$** 

Define the diameter under metric  $\mathfrak{d}$  by  $D = \sup_{x, x' \in A} \mathfrak{d}(x, x')$ . For any  $x, x' \in A$ ,

$$\begin{aligned} \mathfrak{d}(x, x')^2 &= \mathbb{E}(g(x) - g(x'))^2 \leq 4 \sup_{x \in A} \mathbb{E}(g(x))^2 \\ &= 4 \sup_{x \in A} \mathbb{E}(Z(x) - \mathcal{I}_{\Psi, \mathbf{X}}Z(x))^2 \\ &= 4\sigma^2 \sup_{x \in A} (\Psi(x - x) - r^T(x)K^{-1}r(x)) = 4\sigma_A^2. \end{aligned} \quad (31)$$

Thus we conclude that

$$D \leq 2\sigma_A. \quad (32)$$

**Step 3: Bounding the entropy integral**

By Equation 30 and Equation 32,

$$\begin{aligned}
\int_0^{D/2} \sqrt{\log N(\epsilon, A, \mathfrak{d})} d\epsilon &\leq \int_0^{\sigma_A} \sqrt{p \log \left( \frac{48A_0 D_\Omega \sigma^2 \sigma_A^2}{\epsilon^4} + 1 \right)} d\epsilon \\
&\leq \left( \int_0^{\sigma_A} d\epsilon \right)^{1/2} \left( \int_0^{\sigma_A} p \log \left( \frac{48A_0 D_\Omega \sigma^2 \sigma_A^2}{\epsilon^4} + 1 \right) d\epsilon \right)^{1/2} \\
&= \left( \int_0^{\sigma_A} d\epsilon \right)^{1/2} \left( \sigma \int_0^{\sigma_A/\sigma} p \log \left( \frac{48A_0 D_\Omega \sigma_A^2}{u^4 \sigma^2} + 1 \right) du \right)^{1/2} \\
&\leq \sigma_A^{1/2} \left( \sigma \int_0^{\sigma_A/\sigma} p \log \left( \frac{48A_0 D_\Omega \sigma_A^2}{u^4 \sigma^2} + \frac{\sigma_A^2}{u^4 \sigma^2} \right) du \right)^{1/2} \\
&\leq \sqrt{2p} \sigma_A \sqrt{\log(e^2 \sqrt{1 + 48A_0 D_\Omega \sigma / \sigma_A})} \\
&\leq \sqrt{4p} \sigma_A \sqrt{\log(e \sqrt{1 + 48A_0 D_\Omega})} \sqrt{\log(e \sigma / \sigma_A)} \\
&\leq c \sqrt{p(1 \vee \log(A_0 D_\Omega))} \sigma_A \sqrt{\log(e \sigma / \sigma_A)}, \tag{33}
\end{aligned}$$

where  $c = \sqrt{6 \log(7e)}$ .

**Step 4: Bounding**  $\mathbb{P}(\sup_{x \in A} Z(x) - \mu(x) > \eta \int_0^{D/2} \sqrt{\log N(\epsilon, A, \mathfrak{d})} d\epsilon + u)$

By Lemmas 1 and 2, we have

$$P\left(\sup_{x \in A} Z(x) - \mu(x) > \eta \int_0^{D/2} \sqrt{\log N(\epsilon, A, \mathfrak{d})} d\epsilon + t\right) \leq e^{-t^2/(2\sigma_A^2)}. \tag{34}$$

By plugging Equation 33 into Equation 34, we obtain the desired inequality with  $\eta_1 = c\eta$ , which completes the proof.

## F CALIBRATING $C$ VIA SIMULATION

An upper bound of the constant  $C$  in Theorem 1 can be obtained by examine the proof of Lemma 1 and Theorem 3. However, this theoretical upper bound can be too large for practical use. In this section, we consider estimating  $C$  via numerical simulation.

According to Part 1 of Theorem 1,

$$C_0 \geq \mathbb{E}M / \sqrt{p(1 \vee \log(A_0 D_\Omega))},$$

where  $M = \sup_{x \in \Omega} \frac{Z(x) - \mu(x)}{\sigma(x) \log^{1/2}(e\sigma/\sigma(x))}$ ,  $A_0$  is as in Equation 1, and  $D_\Omega$  is the Euclidean diameter of  $\Omega$ . For a specific Gaussian process,  $\mathbb{E}M / \sqrt{p(1 \vee \log(A_0 D_\Omega))}$  is a constant and can be obtained by Monte Carlo. Let  $\mathcal{M}$  be the collection of Gaussian processes satisfying the conditions of Theorem 1. Then

$$C_0 = \sup_{M \in \mathcal{M}} \mathbb{E}M / \sqrt{p(1 \vee \log(A_0 D_\Omega))} =: \sup_{M \in \mathcal{M}} H(M).$$

The idea is to consider various Gaussian processes and find the maximum value of  $\mathbb{E}M / \sqrt{p(1 \vee \log(A_0 D_\Omega))}$ . This value can be close to  $C$  when we cover a broad range of Gaussian processes.

In the numerical studies, we consider  $\Omega = [0, 1]^p$  for  $p = 1, 2, 3$ . We consider different  $A_0$  values to get different  $A_0 D_\Omega$ 's. In each Monte Carlo sampling, we approximate  $M$  using

$$M_1 = \sup_{x \in \Omega_1} \frac{Z(x) - \mu(x)}{\sigma(x) \log^{1/2}(e\sigma/\sigma(x))},$$

where  $\Omega_1$  is the first 100, 1000, 2000 points of the Halton sequence (Niederreiter, 1992) for  $p = 1, 2, 3$ , respectively. We calculate the average of  $M_1 / \sqrt{p(1 \vee \log(A_0 D_\Omega))}$  over all the simulated realizations of each Gaussian process.

Specifically, We simulate 1000 realizations of the Gaussian processes for  $p = 1$ , 100 realizations for  $p = 2, 3$  and consider the following four cases. In Cases 1-3, we use maximin Latin hypercube designs (Santner et al., 2003), and use independent samples from the uniform distribution in Case 4.

**Case 1:** We consider  $p = 1$  with 20 and 50 design points. We consider the Gaussian correlation functions and Matérn correlation functions with  $\nu = 1.5, 2.5, 3.5$ . The results are presented in Table 2.

**Case 2:** We consider  $p = 2$  with 20, 50, and 100 design points. We consider the Gaussian correlation functions and product Matérn correlation functions with  $\nu = 1.5, 2.5, 3.5$ . The results are presented in Table 3.

**Case 3:** We consider  $p = 3$  with 20, 50, 100 and 500 design points. We consider the product Matérn correlation functions with  $\nu = 1.5, 2.5, 3.5$ . The results are shown in Table 4.

**Case 4:** We consider  $p = 2$  with 20, 50, and 100 design points. We consider the product Matérn correlation functions with  $\nu = 1.5, 2.5, 3.5$ . The results are shown in Table 5.

Table 2: Simulation results of Case 1

|             | design points | $A_0 D_\Omega = 1$ | $A_0 D_\Omega = 3$ | $A_0 D_\Omega = 5$ | $A_0 D_\Omega = 10$ | $A_0 D_\Omega = 25$ |
|-------------|---------------|--------------------|--------------------|--------------------|---------------------|---------------------|
| Gaussian    | 20            | 0.11640290         | 0.1978563          | 0.2450737          | 0.4542654           | 0.859318            |
|             | 50            | 0.08102775         | 0.0916648          | 0.1206034          | 0.1683377           | 0.422786            |
| $\nu = 1.5$ | 20            | 0.9640650          | 1.065597           | 0.9537634          | 0.9429957           | 1.0197966           |
|             | 50            | 0.9442937          | 1.009187           | 0.8981430          | 0.8331926           | 0.8372607           |
| $\nu = 2.5$ | 20            | 0.7432965          | 0.8554707          | 0.7804686          | 0.8371662           | 1.0074204           |
|             | 50            | 0.7304104          | 0.8218710          | 0.7346077          | 0.6987832           | 0.7563067           |
| $\nu = 3.5$ | 20            | 0.6054239          | 0.7248086          | 0.6833789          | 0.7711124           | 0.9608837           |
|             | 50            | 0.3367513          | 0.6941391          | 0.6244660          | 0.6278185           | 0.6928741           |

Table 3: Simulation results of Case 2

|             | design points | $A_0 D_\Omega = 1$ | $A_0 D_\Omega = 3$ | $A_0 D_\Omega = 5$ | $A_0 D_\Omega = 10$ | $A_0 D_\Omega = 25$ |
|-------------|---------------|--------------------|--------------------|--------------------|---------------------|---------------------|
| Gaussian    | 20            | 0.2801128          | 0.4767259          | 0.5644628          | 0.7408401           | 1.0554507           |
|             | 50            | 0.1465512          | 0.2927036          | 0.3789438          | 0.5683807           | 0.9309326           |
|             | 100           | 0.1156139          | 0.1961319          | 0.2436626          | 0.4189444           | 0.7641615           |
| $\nu = 1.5$ | 20            | 0.8106718          | 0.9528429          | 0.8748865          | 0.9365989           | 1.0894451           |
|             | 50            | 0.8114071          | 0.9299506          | 0.8568070          | 0.8576984           | 0.9964256           |
|             | 100           | 0.8137517          | 0.9108342          | 0.8224467          | 0.7951887           | 0.9168643           |
| $\nu = 2.5$ | 20            | 0.6072854          | 0.7709362          | 0.7411921          | 0.8540687           | 1.0933120           |
|             | 50            | 0.6316136          | 0.7218077          | 0.7218077          | 0.7690956           | 0.9703693           |
|             | 100           | 0.5651732          | 0.6677120          | 0.6677120          | 0.7090934           | 0.8791792           |
| $\nu = 3.5$ | 20            | 0.5243251          | 0.6881401          | 0.6915576          | 0.8290974           | 1.0876019           |
|             | 50            | 0.3947094          | 0.6420423          | 0.6434791          | 0.7030224           | 0.9494486           |
|             | 100           | 0.2898865          | 0.6279639          | 0.6036111          | 0.6420049           | 0.8373886           |

Table 4: Simulation results of Case 3

| Cases                                               | $H(M)$    |
|-----------------------------------------------------|-----------|
| 20 design points, $\nu = 1.5$ , $A_0 D_\Omega = 1$  | 0.6977030 |
| 500 design points, $\nu = 3.5$ , $A_0 D_\Omega = 5$ | 0.4961581 |
| 100 design points, $\nu = 2.5$ , $A_0 D_\Omega = 3$ | 0.6628567 |
| 50 design points, $\nu = 1.5$ , $A_0 D_\Omega = 10$ | 0.7632713 |

From Tables 2-5, we find the following patterns:

Table 5: Simulation results of Case 4

| Cases                                                | $H(M)$    |
|------------------------------------------------------|-----------|
| 100 design points, $\nu = 3$ , $A_0 D_\Omega = 3$    | 0.6778535 |
| 50 design points, $\nu = 1.5$ , $A_0 D_\Omega = 1$   | 0.8144700 |
| 20 design points, $\nu = 2.5$ , $A_0 D_\Omega = 5$   | 0.7735112 |
| 100 design points, $\nu = 1.5$ , $A_0 D_\Omega = 10$ | 0.8164859 |

- All numerical values ( $H(M)$ ) in Tables 2-5 are less than 1.10. Only eight entries are greater than one.
- In most scenarios, the obtained values are decreasing in  $\nu$ . This implies that  $H(M)$  is smaller when  $M$  is smoother.
- $H(M)$  is not monotonic in  $A_0 D_\Omega$ , which implies a more complicated function relationship between  $H(M)$  and  $A_0 D_\Omega$ .
- In most scenarios,  $H(M)$  decreases as the dimension  $p$  increases.
- The obtained values are decreasing in the number of design points.

In summary, the largest  $H(M)$  values are observed when the sample size is small, the smoothness is low and the dimension is low. Therefore, we believe that our simulation study covers the largest possible  $H(M)$  values and our suggestion of choosing  $C_0 = 1$  can be used in most practical situations.
